# Supplementary material for: Determining protein structures in cellular lamella at pseudo-atomic resolution by GisSPA
Source: Springer Nature journal article supplement (doi:10.1038/s41467-023-36175-y), 2023-03-15
Supplement: MOESM1 [file 41467_2023_36175_MOESM1_ESM.pdf]

1     **Supplementary Figures**

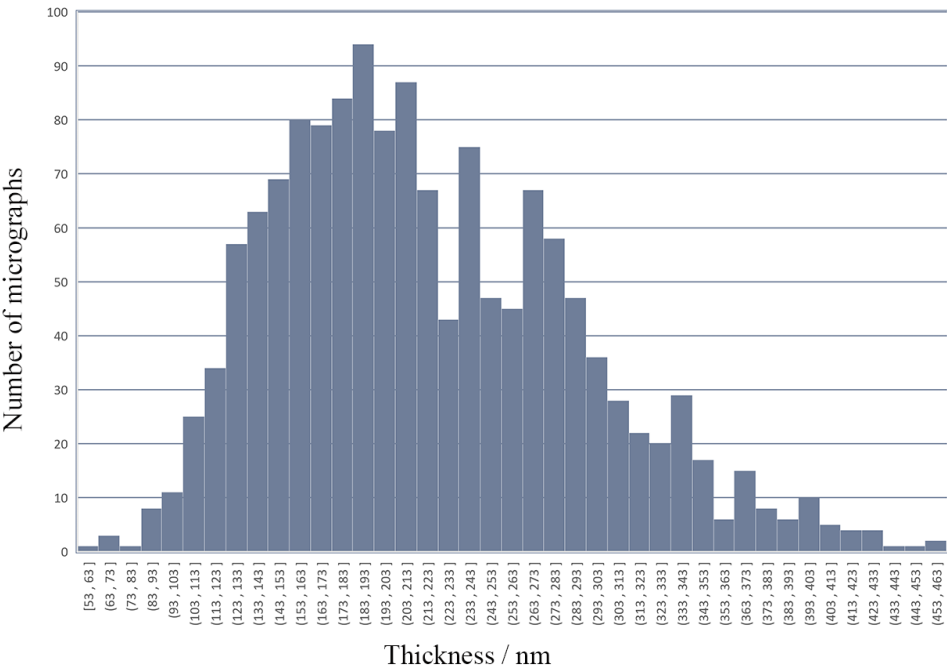

2

3     **Supplementary Fig. 1. Histogram of estimated thickness distribution of *P. purpureum***

4     **lamellae.** Thickness of the 1,437 micrographs of *P. purpureum* lamellae ranges from 60 to 460

5     nm. 95% of the lamellae are 100–350 nm thick and 50% of the lamellae are thicker than 200 nm.

6     Source data are provided as a Source Data file.

7

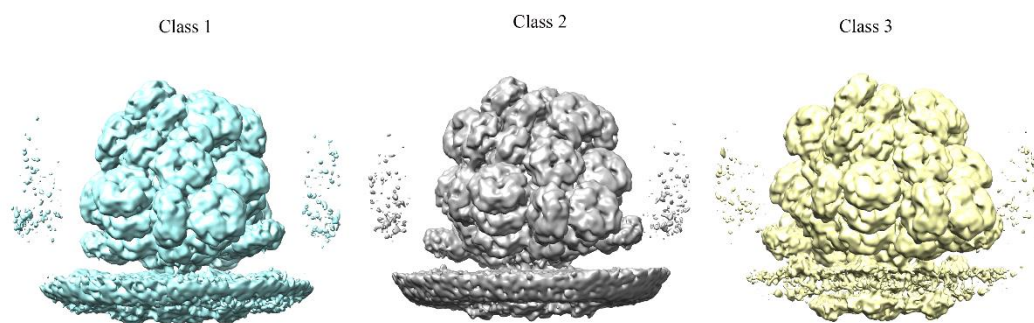

8

9 **Supplementary Fig. 2. 3D classes of PBS particles detected by GisSPA.** Each class contains

10 thylakoid membranes and weak PBS densities nearby.

11

a

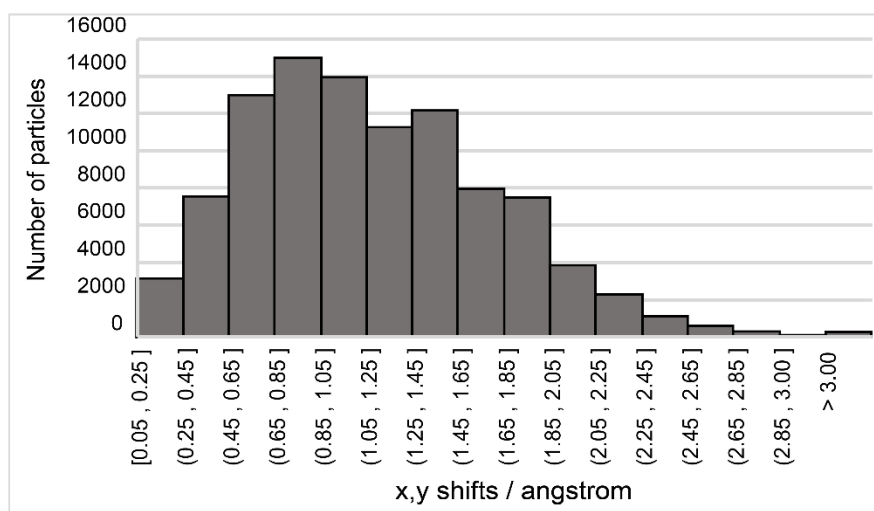

b

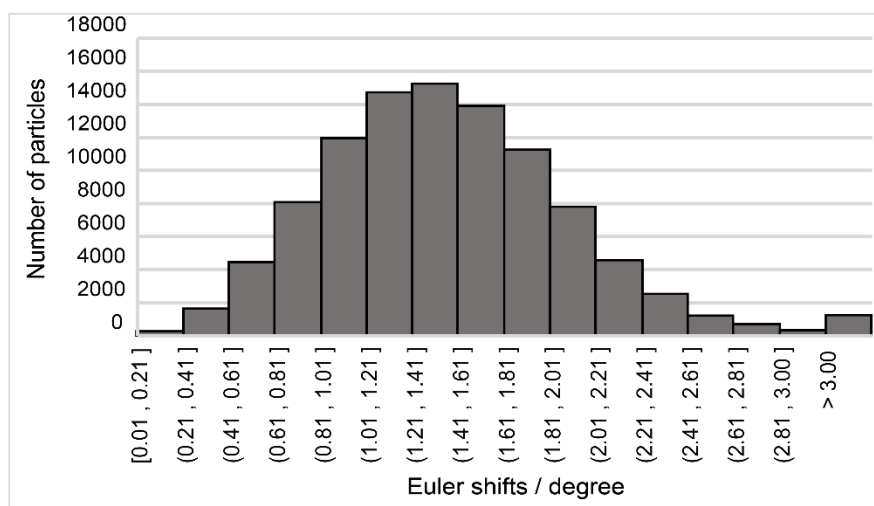

12

13 **Supplementary Fig. 3. Displacement of PBS particles.** a Statistics on the displacement of PBS  
 14 particle locations. b Statistics on the displacement of PBS particle orientations. Source data are  
 15 provided as a Source Data file.

16

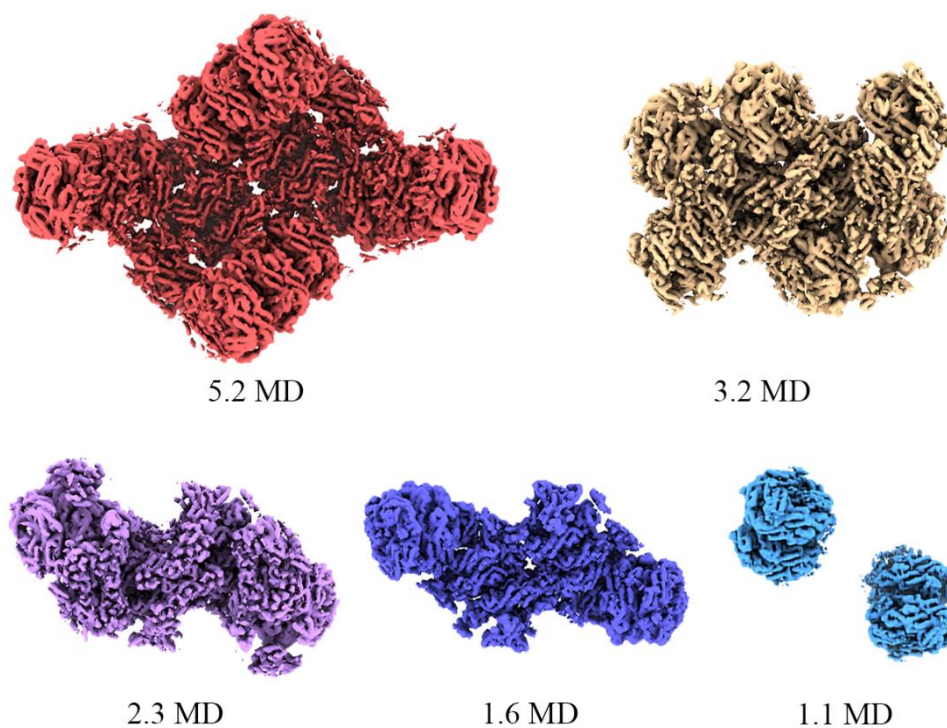

**Supplementary Fig. 4. 3D maps used as models in different molecular weights.** Maps are segmented from the PBS map with a molecular weight of 5.2 MD (red), 3.2 MD (orange) , 2.3 MD (light purple), 1.6 MD (dark purple) and 1.1 MD (blue) respectively. All maps have a 2-fold symmetry.

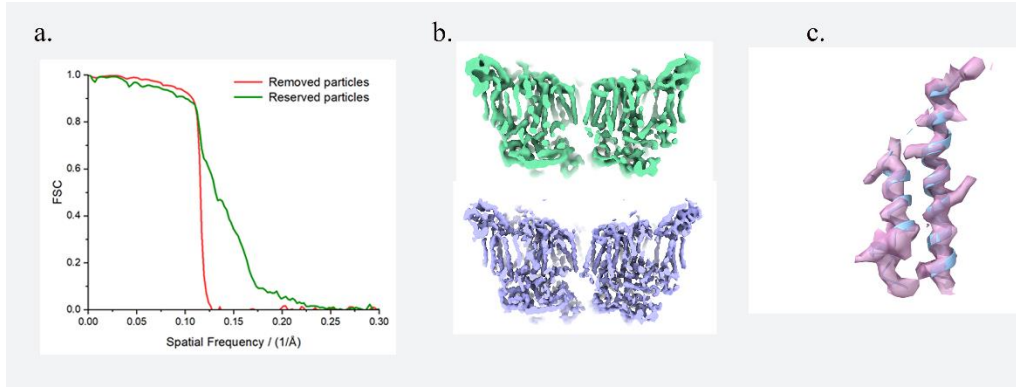

**Supplementary Fig. 5. Processing on PSII complex.** a FSC curves of reconstructions from removed particles (red) and reserved particles (green) distinguished by sorting. b Densities of map at 5.7 Å before sorting (green) and densities of map after sorting at 4.7 Å (purple). c Densities of  $\alpha$ -helices from the 3.9-Å map, the map was fitted with PDB (6jio). Source data are provided as a Source Data file.

30

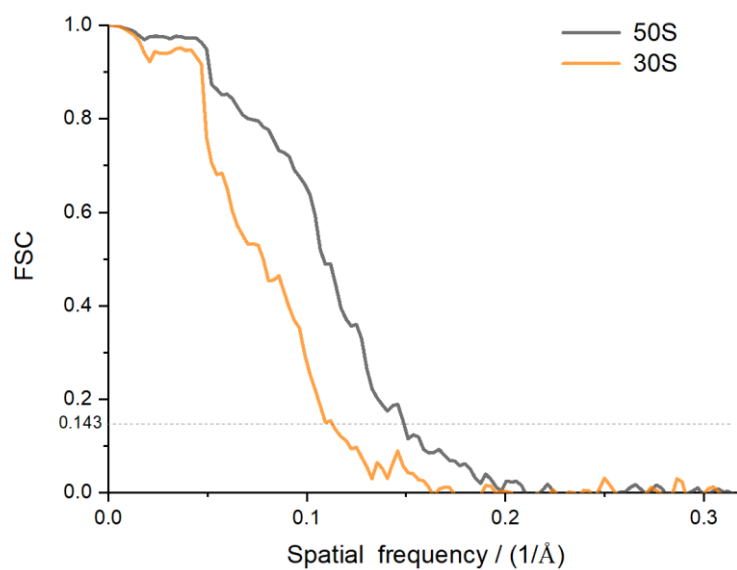

31

32 **Supplementary Fig. 6. FSC of ribosome.** Standard FSC curves of 50S subunit (gray) and 30S

33 subunit (orange). Source data are provided as a Source Data file.

34

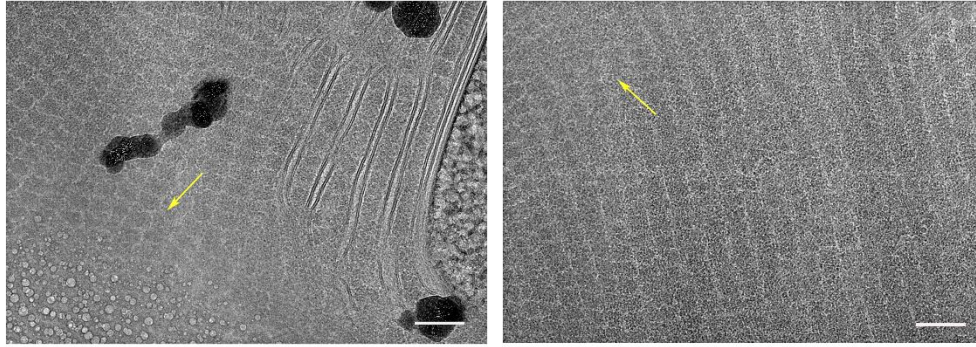

35

36 **Supplementary Fig. 7. Micrographs contain double illuminated area.** Areas with double

37 exposures are indicated by yellow arrows, scale bars represent 100 nm.

38

39 Supplementary Table 1. **Cryo-EM data collection, refinement statistics.**

40

|                                                     | PBS( GisSPA) |           |           | PSII (GisSPA) |           |
|-----------------------------------------------------|--------------|-----------|-----------|---------------|-----------|
|                                                     | PBS          | PSII-1    | PSII-2    | PSII-3        | PSII      |
| <b>Data collection and processing</b>               |              |           |           |               |           |
| Magnification                                       | 53,000       | 53,000    | 53,000    | 53,000        | 53,000    |
| Voltage (kV)                                        | 300          | 300       | 300       | 300           | 300       |
| Electron exposure (e <sup>-</sup> /Å <sup>2</sup> ) | 35           | 35        | 35        | 35            | 35        |
| Defocus range (μm)                                  | -1.0~-6.0    | -1.0~-6.0 | -1.0~-6.0 | -1.0~-6.0     | -1.0~-6.0 |
| Pixel size (Å)                                      | 1.668        | 1.668     | 1.668     | 1.668         | 1.632     |
| Symmetry imposed                                    | C1           | C1        | C1        | C1            | C2        |
| Initial particle images (no.)                       | 651,784      | 651,784   | 651,784   | 651,784       | 482,888   |
| Final particle images (no.)                         | 502,916      | 229,758   | 229,758   | 147,568       | 23,410    |
| Map resolution (Å)                                  | 3.4          | 3.6       | 3.7       | 4.4           | 3.9       |
| FSC threshold                                       | 0.143        | 0.143     | 0.143     | 0.143         | 0.143     |
| Map resolution range (Å)                            | 3.4-8        |           |           |               |           |

41

42
